# Supplementary material for: Transformed yeast (Schizosaccharomyces pombe) overexpressing rice Tau class glutathione S-transferase (OsGSTU30 and OsGSTU41) shows enhanced resistance to hexavalent chromium
Source: Royal Society of Chemistry journal article supplement (doi:10.1039/c4mt00083h), 2014-01-01
Supplement: c4mt00083h1.pdf [file c4mt00083h1.pdf]

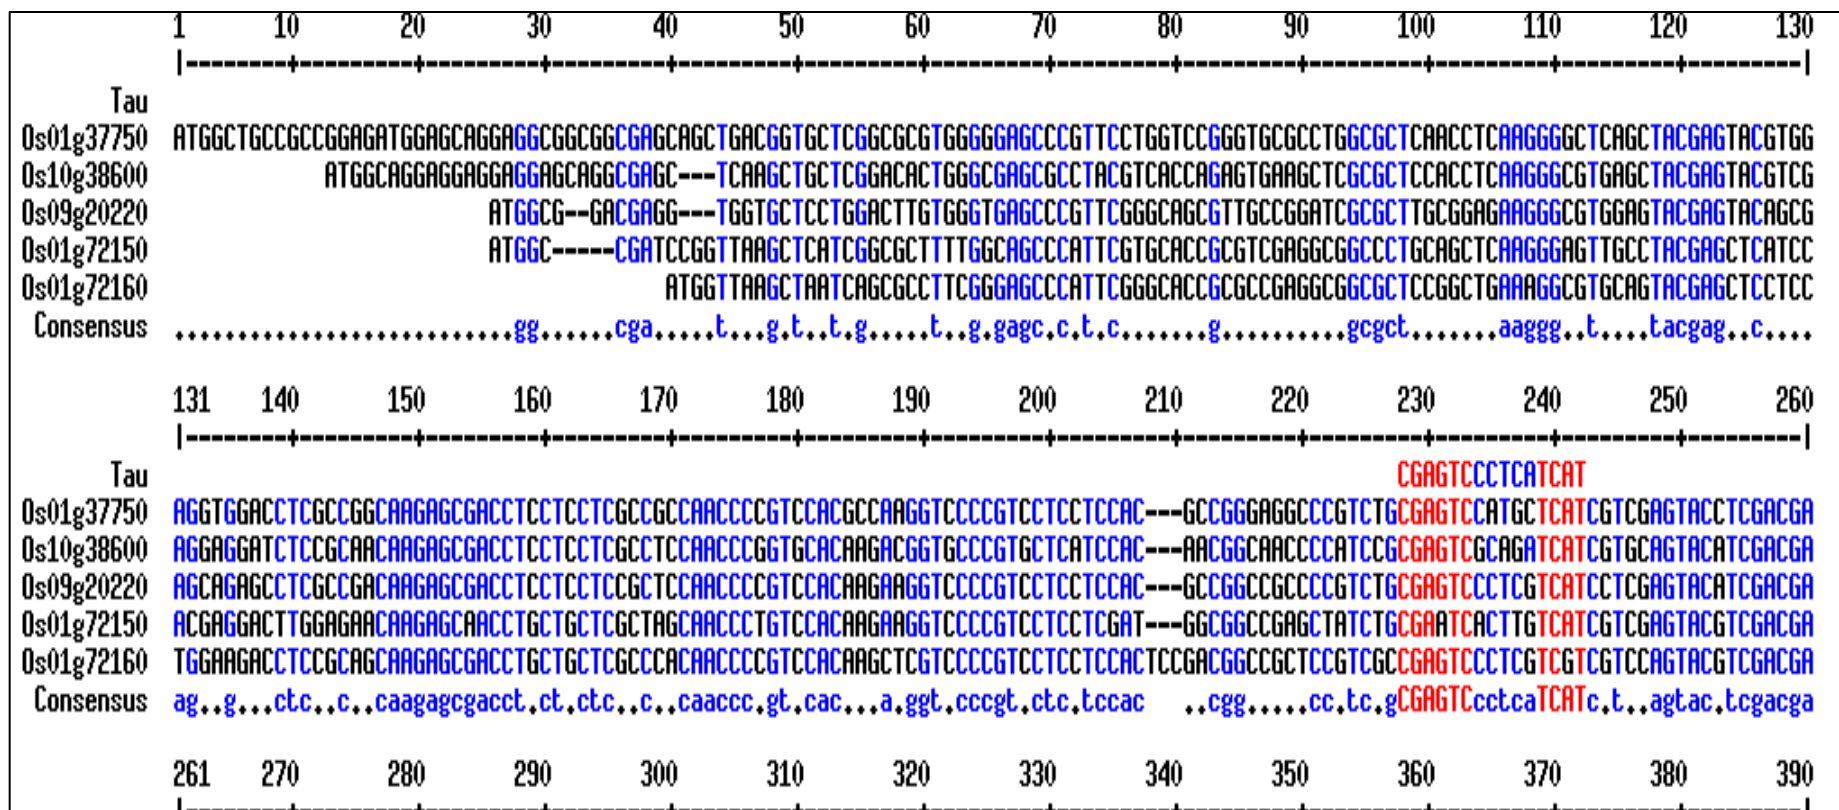

Figure S2. Multiple sequence alignment of partial nucleotide sequence showing conserve domain specific to GST

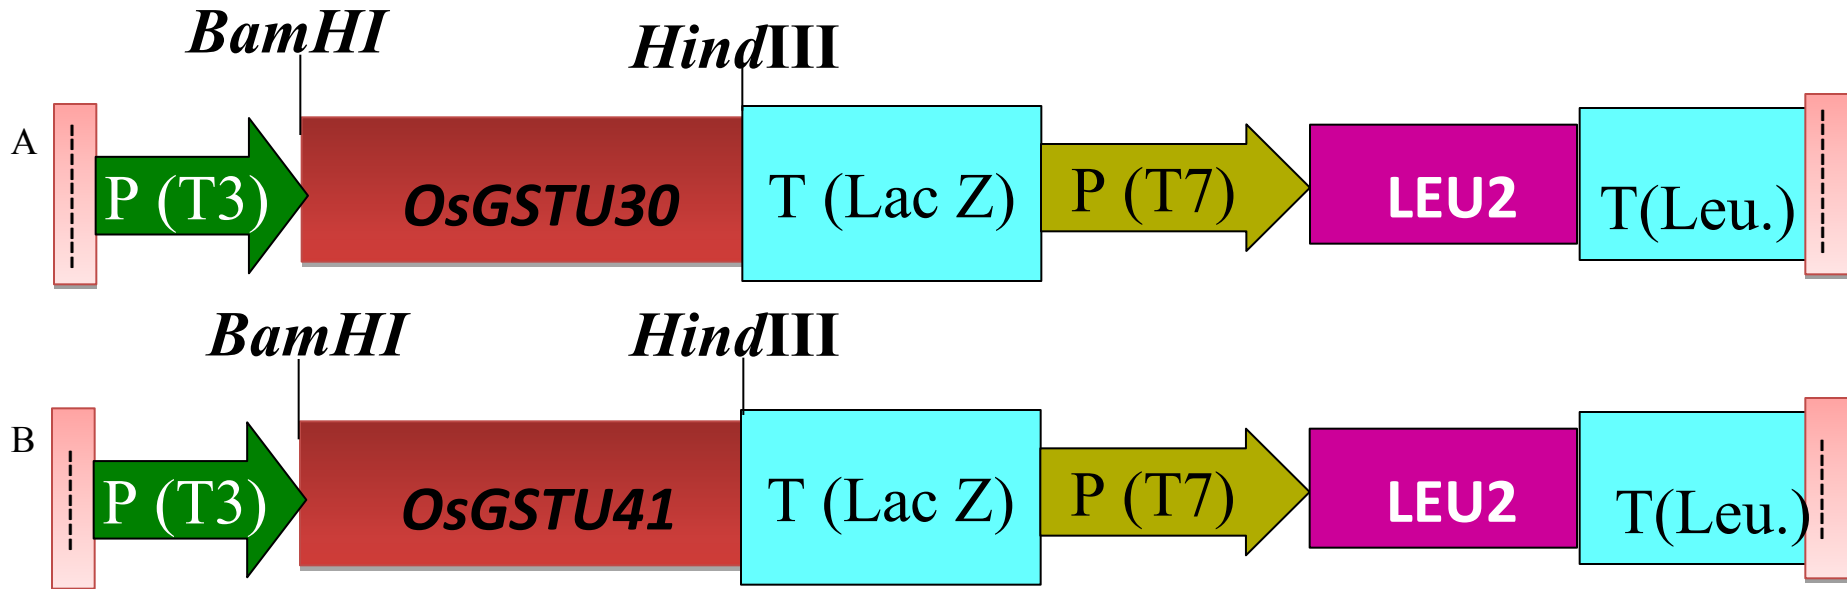

Figure S5. Construct map of Cloning vector used for transformation of *OsGSTU30* (A) and *OsGSTU41*(B) genes of Rice into *Schizosacharomyces pombe* (SP6) strain of yeast. pSP1 vector was used for transformation. 'P' denotes promoter site whereas 'T' denotes terminator site
