# Supplementary material for: Transformed yeast (Schizosaccharomyces pombe) overexpressing rice Tau class glutathione S-transferase (OsGSTU30 and OsGSTU41) shows enhanced resistance to hexavalent chromium
Source: Royal Society of Chemistry journal article supplement (doi:10.1039/c4mt00083h), 2014-01-01
Supplement: c4mt00083h2.pdf [file c4mt00083h2.pdf]

**Table S1. Gene family of selected GST genes in rice.**

| Gene Name       | Locus ID   | Synonym         | Class | Pseudomolecule position | Mol. Wt. (Da) | Direction of transcription |
|-----------------|------------|-----------------|-------|-------------------------|---------------|----------------------------|
| <i>OsGSTU5</i>  | Os09g20220 | <i>OsGSTU5</i>  | TAU   | 12120224 -<br>12119538  | 25842.58      | Upward                     |
| <i>OsGSTU6</i>  | Os01g37750 |                 | TAU   | 21442537 -<br>21441785  | 26022.7       | Upward                     |
| <i>OsGSTF10</i> | Os01g27390 | <i>OsGSTF10</i> | PHI   | 15618603 -<br>15621075  | 23930.56      | Downward                   |
| <i>OsGSTU30</i> | Os10g38600 | <i>OsGSTU30</i> | TAU   | 20265421 -<br>20266251  | 25780.31      | Downward                   |
| <i>OsGSTU37</i> | Os01g72150 |                 | TAU   | 42173295 -<br>42174100  | 25733.44      | Downward                   |
| <i>OsGSTU41</i> | Os01g72160 |                 | TAU   | 42174579 -<br>42175739  | 25523.19      | Downward                   |

**Table S3. List of primers used for RT-PCR analysis of Cr (VI) stress responsive genes in rice roots.**

| Gene name (Locus ID)         | Primers                                                            |
|------------------------------|--------------------------------------------------------------------|
| <i>OsGSTU5</i> (Os09g20220)  | F: 5'-CTCGTCATCCTCGAGTACATCG-3'<br>R: 5'-GCTTCTTGTCGACGTAGTCCG-3'  |
| <i>OsGSTU6</i> (Os01g37750)  | F: 5'-CAGGATCGTGGACGCGGACAG-3'<br>R: 5'-CCGCCGCGATGAGGCGTTCGAG-3'  |
| <i>OsGSTU10</i> (Os01g27390) | F: 5'-ATTAAGCAGACGGCATCTTCAG-3'<br>R: 5'-GCATCATGTCACGCAACGCTGA-3' |
| <i>OsGSTU30</i> (Os10g38600) | F: 5'-GATCTCCGCAACAAGAGCGACC-3'<br>R: 5'-GTCGATGTACTGCACGATGATC-3' |
| <i>OsGSTU37</i> (Os01g72150) | F: 5'-AGCTATCTGCGAATCACTTGTC-3'<br>R: 5'-ACGGCAACGTGCACTTGTGATC-3' |
| <i>OsGSTU41</i> (Os01g72160) | F: 5'-GCCGAGTCCCTCGTCGTCGTC-3'<br>R: 5'-ATGGAGGGAGTACGTCTTAATC-3'  |
| Actin                        | F: 5'-GAGTATGATGAGTCGGGTCCAG-3'<br>R: 5'-ACACCAACAATCCCAAACAGAG-3' |

**Table S4. List of primers of both genes (OsGSTU30, OsGSTU41) used for cloning and transformation. Underline sequences showing sequence of restriction site.**

| <b>Gene name(Locus ID)</b>   | <b>Primers</b>                                                                                                                |
|------------------------------|-------------------------------------------------------------------------------------------------------------------------------|
| <i>OsGSTU30</i> (Os10g38600) | F1: 5'-GAAA <u>ACTCCCCGGGCGTAG</u> -3'<br>R1: 5'-CGACGCCTGCTTAAGCTGAG-3'                                                      |
| <i>OsGSTU41</i> (Os01g72160) | F1: 5'-GCCACTAACCCGGTGTAAGC-3'<br>R1: 5'-CAGCATCGAAATTCACGAG-3'                                                               |
| <i>OsGSTU30</i> (Os10g38600) | F2: 5'-GTGCAGGAAATGGCAGGAGGAGGAG-3'<br>R2: 5'-CTGAGTAAATTCAGTTGTTG-3'                                                         |
| <i>OsGSTU41</i> (Os01g72160) | F2: 5'-GCAAGCAAAAAATGGTTAAGCT -3'<br>R2: 5'-CGAGTAATAAAATTACTGC-3'                                                            |
| <i>OsGSTU30</i> (Os10g38600) | F(BamHI): 5'-CGGGAT <u>CCCGATGGCACCAGGAGGAGGAGC</u> -3'<br>R(HindIII): 5'-CCCA <u>AAGCTTGGGCTGAGTAAATTCAGTTGTTT</u> G-3'      |
| <i>OsGSTU41</i> (Os01g72160) | F(BamHI): 5'-GGGAT <u>CCCAATGGTTAAGCTAATCAGCGCCTTC</u> -3'<br>R(HindIII): 5' <u>CCCAAGCTTGGGATTATTTCTGCAACTTTGCCTTGGC</u> -3' |
